# Supplementary material for: Analysis of Standardized Training for Free Medical Students from Rural Areas in Yunnan Province: A Multi-center Cross-sectional Survey
Source: Research Square preprint supplement (doi:10.21203/rs.3.rs-6576248/v1), 2025-06-12
Supplement: Supplementary file 1 [file d2a197ad85dbf609e233794f.docx]

### Appendix

**Appendix 1: Trainee Survey Questionnaire**
**Questionnaire ID □□□□**

**Yunnan Province Resident Training System Implementation Status Survey Questionnaire (Trainee)**

Dear Trainees,

We are members of the Yunnan Province Resident Training Evaluation Working Group. This survey is commissioned by the Yunnan Provincial Health Commission to gain an in-depth understanding of the implementation status of the resident training system in Yunnan Province, and to provide a basis for further improvements. This is an anonymous self-administered questionnaire; no signature is required. All information obtained will be kept confidential. Please fill in the answer at the “○” or mark “√” on the option number for each question. Unless specified as multiple-choice, all questions are single-choice. Do not skip any items.

Thank you for your support and cooperation!

**Yunnan Province Resident Training System Implementation Status Survey Group**
**June 2022**

### Part 1: Basic Information

**1.01** Name of your training base: ______
**1.02** Gender: ① Male ② Female
**1.03** Age (in years): ______
**1.04** Marital status: ① Married ② Unmarried
**1.05** Ethnicity: ① Han ② Yi ③ Dai ④ Bai ⑤ Other (specify) ______
**1.06** Your training specialty category: ① Internal Medicine ② Surgery ③ Medical Technology ④ Dentistry
**1.07** Highest degree obtained before training: ① Ph.D. ② Master’s ③ Bachelor’s
**1.08** Are you a general practice resident trainee? ① Yes ② No
**1.09** Are you an order-oriented medical student? ① Yes ② No
**1.10** Place of origin: ① Within Yunnan ② Outside Yunnan
**1.11** Institution of your highest degree: ① Yunnan-based ② Non-Yunnan-based
**1.12** Type of institution: ① Public ② Private
**1.13** Your trainee status: ① Institutional trainee ② Independent trainee ③ Professional Master’s student
**1.14** Duration of training participation: ______ year(s)
**1.15** Have you registered for the Practicing Physician Qualification Exam? ① Yes ② No (Skip to **1.19**)
**1.16** First registration year for the exam: ______
**1.17** Do you hold a Practicing Physician Qualification Certificate? ① Yes ② No
**1.18** When did you pass the exam?
① Before training ② 1st training year ③ 2nd training year ④ 3rd training year ⑤ Not passed

### Part 2: Training Awareness

**2.01** How familiar are you with the standards of your specialty’s resident training?
① Not at all ② Slightly ③ Moderately ④ Mostly ⑤ Fully
**2.02** Your attitude toward the resident training policy? ① Oppose (Skip to **2.04**) ② Support (Answer **2.03**)
**2.03** Reasons for support (multiple answers allowed):
① Enhances medical skills ② Standardizes training ③ Improves grassroots healthcare
④ Increases job opportunities ⑤ Boosts patient communication ⑥ Other: ______
**2.04** Reasons for opposition (multiple answers allowed):
① Poor training quality ② Long duration ③ Low stipends
④ Perceived unfairness ⑤ No post-training career advantage
⑥ Post-training employment difficulties ⑦ Financial hardship ⑧ Other: ______
**2.05** Are you aware of the requirements for the final assessment?
① Not at all ② Slightly ③ Moderately ④ Mostly ⑤ Fully
**2.06** Key factors affecting training quality (multiple answers):
① Mentors’ teaching ability ② Trainee self-learning ③ Departmental management
④ Strict assessments ⑤ Hands-on opportunities (ward rounds, skills training, night shifts)
⑥ Teaching activities (rounds, case discussions, lectures) ⑦ Feedback on medical records ⑧ Other: ______
**2.07** How effective is your training base? ① Very poor ② Poor ③ Neutral ④ Good ⑤ Excellent
**2.08** Current issues in Yunnan’s resident training (multiple answers):
① Limited academic growth ② Long duration ③ Poor management
④ Superficial assessments ⑤ No career advantage ⑥ Post-training unemployment ⑦ Other: ______
**2.09** Your current mental state: ① Positive ② Slightly positive ③ Neutral ④ Slightly negative ⑤ Negative

### Part 3: Evaluation and Assessment

**3.01** Does your base’s training plan align with specialty requirements?
① No ② Partially no ③ Neutral ④ Mostly yes ⑤ Fully yes
**3.02** Is rotation scheduling strictly followed?
① No ② Partially no ③ Neutral ④ Mostly yes ⑤ Fully yes
**3.03** Are teaching activities (e.g., clinical skills training, lectures, rounds) conducted as required?
① No ② Partially no ③ Neutral ④ Mostly yes ⑤ Fully yes
**3.04** Have you undergone routine assessments? ① Yes ② No
**3.05** Have you undergone rotation exit assessments? ① Yes ② No
**3.06** Have you undergone annual assessments? ① Yes ② No
**3.07** Have you undergone annual proficiency tests? ① Yes ② No
**3.08** Have you completed the final assessment? ① Yes ② No
**3.09** Personal factors affecting final assessment performance (multiple answers):
① Pre-training background ② Academic education ③ Training duration (leave, etc.) ④ Family issues
**3.10** Training-related factors (multiple answers):
① Base conditions ② Specialty level ③ Teaching quality
④ Workload ⑤ Hands-on opportunities ⑥ Assessment rigor
⑦ Pre-exam training ⑧ Other: ______
**3.11** Assessment process factors (multiple answers):
① Flawed exam design ② Unreasonable process ③ Examiner bias ④ Other: ______
**3.12** Frequency of skill training at your base:
① Weekly ② Biweekly ③ Monthly ④ Bimonthly ⑤ >Bimonthly
**3.13** Frequency of lectures organized by the base:
① Weekly ② Biweekly ③ Monthly ④ Bimonthly ⑤ >Bimonthly
**3.14** Is there a dedicated teaching coordinator during rotations? ① Yes ② No
**3.15** Are mentors capable of teaching?
① No ② Slightly ③ Moderately ④ Mostly ⑤ Fully
**3.16** Areas for mentor improvement (multiple answers):
① Theoretical knowledge ② Skills ③ Teaching methods ④ Research ability ⑤ Attitude ⑥ Other: ______
**3.17** Is funding sufficient? ① Yes ② No
**3.18** Is the stipend adequate for daily expenses? ① Yes ② No
**3.19** Are accommodations reasonable? ① Yes ② No
**3.20** Does the base organize ideological activities? ① Yes ② No
**3.21** Does the base organize team-building? ① Yes ② No
**3.22** Suggestions for improving Yunnan’s resident training:

**Part 4: Self-evaluation of Core Competencies After Participating in Residency Training** (Rate on a scale of 1 to 5, where 1 = No improvement, 2 = Slight improvement, 3 = Moderate improvement, 4 = Significant improvement, 5 = Major improvement. Please fill in the corresponding number only.)

| **Item** | **Score** |
| --- | --- |
| 4.01 Professionalism |  |
| 4.02 Clinical Skills |  |
| 4.03 Patient Management |  |
| 4.04 Communication and Collaboration |  |
| 4.05 Teaching Ability |  |
| 4.06 Learning and Advancement |  |

**Part 5: Satisfaction with Residency Training** (Rate your satisfaction on a scale of 1 to 5, where 1 = Very Dissatisfied, 2 = Dissatisfied, 3 = Neutral, 4 = Satisfied, 5 = Very Satisfied. Please fill in the corresponding number only.)

| **Item** | **Satisfaction Score** |
| --- | --- |
| 5.01 Satisfaction with clinical skills training provided by the training base |  |
| 5.02 Satisfaction with the development of general practice thinking skills |  |
| 5.03 Satisfaction with the use of the residency training management information system |  |
| 5.04 Satisfaction with living conditions during training |  |
| 5.05 Satisfaction with compensation during the training period |  |
| 5.06 Satisfaction with the training efficacy of the base |  |
| 5.07 Satisfaction with the teaching ability of instructors |  |
| 5.08 Satisfaction with the examiners of the training assessment |  |
| 5.09 Overall satisfaction with residency training in Yunnan Province |  |

**This concludes the survey. Thank you for your cooperation!**

Survey Date

Survey Personnel

Review Personnel
